# Supplementary material for: A comparative multi-parametric in vitro model identifies the power of test conditions to predict the fibrotic tendency of a biomaterial
Source: PubMed Central journal article supplement (PMC5431855; doi:10.1038/s41598-017-01584-9), 2017-05-10
Supplement: 41598_2017_1584_MOESM1_ESM.pdf [file 41598_2017_1584_MOESM1_ESM.pdf]

„A comparative multi-parametric *in vitro* model identifies the power of test conditions to predict the fibrotic tendency of a biomaterial“

Maren Jannasch<sup>1</sup>, Sabine Gaetzner<sup>1</sup>, Tobias Weigel<sup>1</sup>, Heike Walles<sup>1,2</sup>, Tobias Schmitz<sup>1</sup>,  
Jan Hansmann<sup>1,2\*</sup>

<sup>1</sup> University Hospital Wuerzburg, Department Tissue Engineering and Regenerative Medicine (TERM), Roentgenring 11, 97070 Wuerzburg, Germany

<sup>2</sup> Translational Center Wuerzburg `Regenerative Therapies in Oncology and Musculoskeletal Disease`, 97070 Wuerzburg, Germany

\*Corresponding author:

Dr.-Ing. Jan Hansmann, University Hospital Wuerzburg, Roentgenring 11, 97070 Wuerzburg, Germany, telephone number +49 931 3181209,

[Jan.Hansmann@uni-wuerzburg.de](mailto:Jan.Hansmann@uni-wuerzburg.de)

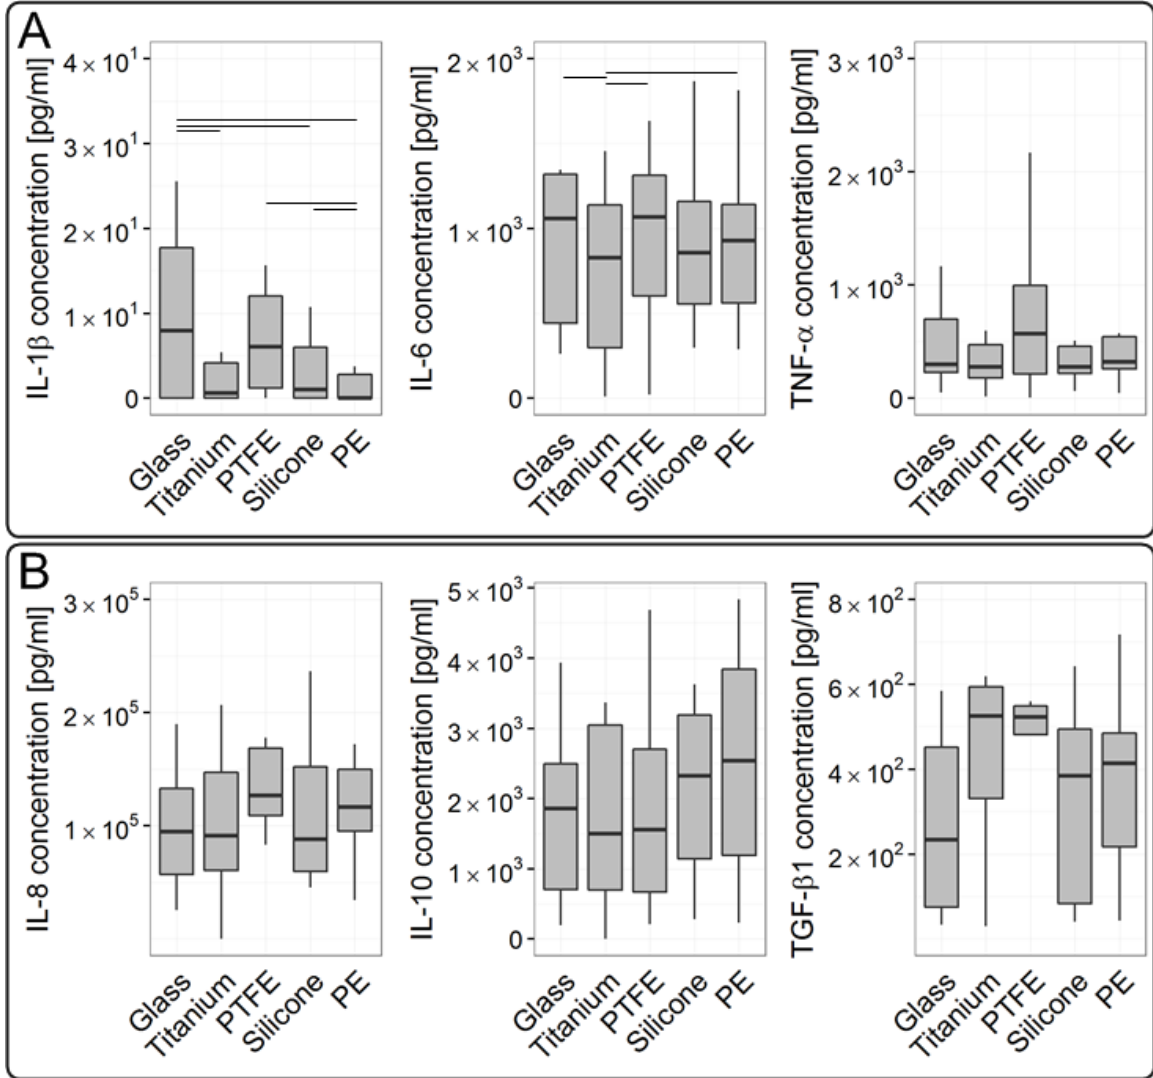

**Figure S1: Pro-inflammatory LPS stimulation of macrophages induced a highly increased secretion of most cytokines compared to material-induced secretion; exceptionally TGF- $\beta$ 1 levels entirely remained LPS-unaffected. (A) Significant differences between materials were found for IL-1 $\beta$  and IL-6, whereas no differences were shown for TNF- $\alpha$  and (B) IL-8, IL-10 and TGF- $\beta$ 1. Supernatants of ten macrophage donors (n = 10) were analyzed. A  $p$ -value  $\leq 0.05$  is considered as significant.**

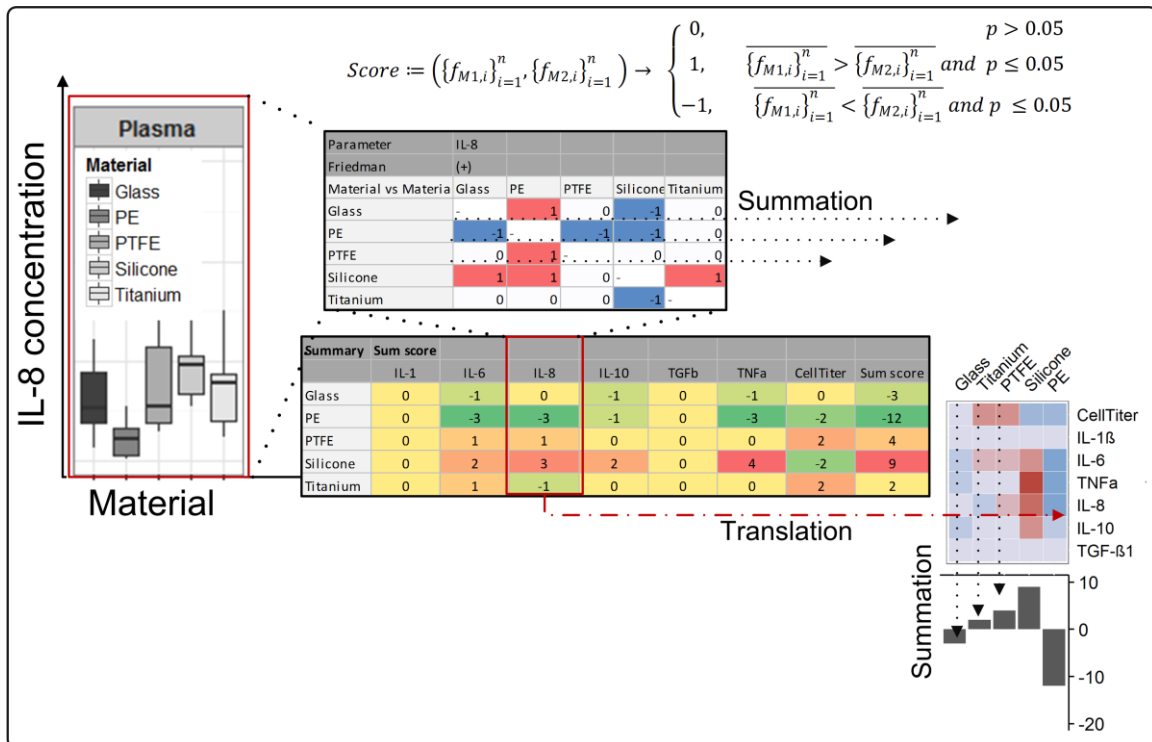

**Figure S2: A scoring system was introduced allowing materials' evaluation. Therefore, under each test condition significant differences between two pairs of tested materials were translated into a scoring with a value of 1 for the significantly higher pair and a scoring of -1 for significantly lower pair ( $p$ -value  $\leq 0.05$ ). If no significant difference was found ( $p$ -value  $> 0.05$ ), a zero value was included in the assessment. For each material, the relevance of a specific readout factor was derived by summation of the significance profile from pair-wise scoring. The obtained factor-dependent relation of a material in comparison to all other materials was visualized in a heat map. To generate a material ranking based on all measured readout factors, finally the sum of all factor-dependent scores was computed.**
